# Supplementary material for: Management of late-preterm and term infants with hyperbilirubinaemia in resource-constrained settings
Source: Springer Nature journal article supplement (doi:10.1186/s12887-015-0358-z), 2015-04-11
Supplement: MOESM2 [file 9746906]

Table S2. Eligible low and middle-income countries (GNI per capita ≤\$6,000)

| SN | COUNTRY                           | Region | HDI RANK 2012 | HDI   | Life Expectancy (Years) | GNI per capita (\$) | Annual Livebirths ('000) | Hospital Delivery (%) |
|----|-----------------------------------|--------|---------------|-------|-------------------------|---------------------|--------------------------|-----------------------|
| 1  | Afghanistan                       | SOA    | 175           | 0.374 | 49.1                    | 1,000               | 1,408                    | 33                    |
| 2  | Angola                            | SSA    | 148           | 0.508 | 51.5                    | 4,812               | 803                      | 46                    |
| 3  | Armenia                           | ECA    | 87            | 0.729 | 74.4                    | 5,540               | 47                       | 99                    |
| 4  | Bangladesh                        | SOA    | 146           | 0.515 | 69.2                    | 1,785               | 3,016                    | 29                    |
| 5  | Belize                            | LAC    | 96            | 0.702 | 76.3                    | 5,327               | 8                        | 89                    |
| 6  | Benin                             | SSA    | 166           | 0.436 | 56.5                    | 1,439               | 356                      | 87                    |
| 7  | Bhutan                            | SOA    | 140           | 0.538 | 67.6                    | 5,246               | 15                       | 63                    |
| 8  | Bolivia, Plurinational State of   | LAC    | 108           | 0.675 | 66.9                    | 4,444               | 264                      | 68                    |
| 9  | Burkina Faso                      | SSA    | 183           | 0.343 | 55.9                    | 1,202               | 730                      | 66                    |
| 10 | Burundi                           | SSA    | 178           | 0.355 | 50.9                    | 544                 | 288                      | 60                    |
| 11 | Cambodia                          | EAP    | 138           | 0.543 | 63.6                    | 2,095               | 317                      | 54                    |
| 12 | Cameroon                          | SSA    | 150           | 0.495 | 52.1                    | 2,114               | 716                      | 61                    |
| 13 | Cape Verde                        | SSA    | 132           | 0.586 | 74.3                    | 3,609               | 10                       | 76                    |
| 14 | Central African Republic          | SSA    | 180           | 0.352 | 49.1                    | 722                 | 156                      | 53                    |
| 15 | Chad                              | SSA    | 184           | 0.34  | 49.9                    | 1,258               | 511                      | 16                    |
| 16 | Comoros                           | SSA    | 169           | 0.429 | 61.5                    | 986                 | 28                       |                       |
| 17 | Congo                             | SSA    | 142           | 0.534 | 57.8                    | 2,934               | 145                      | 92                    |
| 18 | Congo, Democratic Republic of the | SSA    | 186           | 0.304 | 48.7                    | 319                 | 2,912                    | 75                    |
| 19 | Côte d'Ivoire                     | SSA    | 168           | 0.432 | 56                      | 1,593               | 679                      | 57                    |
| 20 | Cuba                              | LAC    | 59            | 0.78  | 79.3                    | 5,539               | 110                      | 100                   |
| 21 | Djibouti                          | MEN    | 164           | 0.445 | 58.3                    | 2,350               | 26                       | 87                    |
| 22 | Egypt                             | MEN    | 112           | 0.662 | 73.5                    | 5,401               | 1,886                    | 72                    |
| 23 | El Salvador                       | LAC    | 107           | 0.68  | 72.4                    | 5,915               | 126                      | 85                    |
| 24 | Eritrea                           | SSA    | 181           | 0.351 | 62                      | 531                 | 193                      | 26                    |
| 25 | Ethiopia                          | SSA    | 173           | 0.396 | 59.7                    | 1,017               | 2,613                    | 10                    |
| 26 | Fiji                              | EAP    | 96            | 0.702 | 69.4                    | 4,087               | 18                       |                       |
| 27 | Gambia                            | SSA    | 165           | 0.439 | 58.8                    | 1,731               | 67                       | 56                    |
| 28 | Georgia                           | ECA    | 72            | 0.745 | 73.9                    | 5,005               | 51                       | 98                    |
| 29 | Ghana                             | SSA    | 135           | 0.558 | 64.6                    | 1,684               | 776                      | 67                    |
| 30 | Guatemala                         | LAC    | 133           | 0.581 | 71.4                    | 4,235               | 473                      | 51                    |
| 31 | Guinea                            | SSA    | 178           | 0.355 | 54.5                    | 941                 | 394                      | 39                    |
| 32 | Guinea-Bissau                     | SSA    | 176           | 0.364 | 48.6                    | 1,042               | 59                       | 42                    |
| 33 | Guyana                            | LAC    | 118           | 0.636 | 70.2                    | 3,387               | 13                       | 89                    |
| 34 | Haiti                             | LAC    | 161           | 0.456 | 62.4                    | 1,070               | 266                      | 25                    |
| 35 | Honduras                          | LAC    | 120           | 0.632 | 73.4                    | 3,426               | 205                      | 67                    |
| 36 | India                             | SOA    | 136           | 0.554 | 65.8                    | 3,285               | 27,098                   | 47                    |
| 37 | Indonesia                         | EAP    | 121           | 0.629 | 69.8                    | 4,154               | 4,331                    | 55                    |
| 38 | Iraq                              | MEN    | 131           | 0.59  | 69.6                    | 3,557               | 1,144                    | 65                    |
| 39 | Jordan                            | MEN    | 100           | 0.7   | 73.5                    | 5,272               | 154                      | 99                    |
| 40 | Kenya                             | SSA    | 145           | 0.519 | 57.7                    | 1,541               | 1,560                    | 43                    |
| 41 | Kiribati                          | EAP    | 121           | 0.629 | 68.4                    | 3,079               | 22                       | 66                    |
| 42 | Kyrgyzstan                        | EAP    | 125           | 0.622 | 68                      | 2,009               | 131                      | 97                    |
| 43 | Lao People's Democratic Republic  | EAP    | 138           | 0.543 | 67.8                    | 2,435               | 140                      | 17                    |
| 44 | Lesotho                           | SSA    | 158           | 0.461 | 48.7                    | 1,879               | 60                       | 59                    |
| 45 | Liberia                           | SSA    | 174           | 0.388 | 57.3                    | 480                 | 157                      | 37                    |
| 46 | Madagascar                        | SSA    | 151           | 0.483 | 66.9                    | 828                 | 747                      | 35                    |
| 47 | Malawi                            | SSA    | 170           | 0.418 | 54.8                    | 774                 | 686                      | 73                    |
| 48 | Mali                              | SSA    | 182           | 0.344 | 51.9                    | 853                 | 728                      | 45                    |
| 49 | Marshall Islands                  | EAP    | ...           | ...   | 72.3                    | 4,040               | 27                       | 85                    |
| 50 | Mauritania                        | SSA    | 155           | 0.467 | 58.9                    | 2,174               | 118                      | 48                    |
| 51 | Micronesia, Federated States of   | EAP    | 117           | 0.645 | 69.2                    | 3,352               | 3                        |                       |
| 52 | Moldova, Republic of              | ECA    | 113           | 0.66  | 69.6                    | 3,319               | 44                       | 99                    |
| 53 | Mongolia                          | EAP    | 108           | 0.675 | 68.8                    | 4,245               | 65                       | 99                    |
| 54 | Morocco                           | MEN    | 130           | 0.591 | 72.4                    | 4,384               | 620                      | 73                    |
| 55 | Mozambique                        | SSA    | 185           | 0.327 | 50.7                    | 906                 | 889                      | 58                    |
| 56 | Myanmar                           | EAP    | 149           | 0.498 | 65.7                    | 1,817               | 824                      | 36                    |
| 57 | Namibia                           | SSA    | 128           | 0.608 | 62.6                    | 5,973               | 60                       | 81                    |
| 58 | Nepal                             | SOA    | 157           | 0.463 | 69.1                    | 1,137               | 722                      | 35                    |
| 59 | Nicaragua                         | LAC    | 129           | 0.599 | 74.3                    | 2,551               | 138                      | 74                    |
| 60 | Niger                             | SSA    | 186           | 0.304 | 55.1                    | 701                 | 777                      | 17                    |
| 61 | Nigeria                           | SSA    | 153           | 0.471 | 52.3                    | 2,102               | 6,458                    | 35                    |
| 62 | Pakistan                          | SOA    | 146           | 0.515 | 65.7                    | 2,566               | 4,764                    | 41                    |
| 63 | Palestine, State of               | MEN    | 110           | 0.67  | 73                      | 3,359               | 33                       |                       |
| 64 | Papua New Guinea                  | EAP    | 156           | 0.466 | 63.1                    | 2,386               | 208                      | 52                    |
| 65 | Paraguay                          | LAC    | 111           | 0.669 | 72.7                    | 4,497               | 158                      | 82                    |
| 66 | Philippines                       | EAP    | 114           | 0.654 | 69                      | 3,752               | 2,358                    | 44                    |
| 67 | Rwanda                            | SSA    | 167           | 0.434 | 55.7                    | 1,147               | 449                      | 69                    |
| 68 | Samoa                             | EAP    | 96            | 0.702 | 72.7                    | 3,928               | 4                        | 81                    |
| 69 | Sao Tome and Principe             | SSA    | 144           | 0.525 | 64.9                    | 1,864               | 5                        | 79                    |
| 70 | Senegal                           | SSA    | 154           | 0.47  | 59.6                    | 1,653               | 471                      | 73                    |
| 71 | Sierra Leone                      | SSA    | 177           | 0.359 | 48.1                    | 881                 | 227                      | 50                    |
| 72 | Solomon Islands                   | EAP    | 143           | 0.53  | 68.2                    | 2,172               | 17                       | 85                    |
| 73 | Somalia                           | SSA    | ...           | ...   | 51.5                    | 150                 | 416                      | 9                     |
| 74 | South Sudan                       | SSA    | ...           | ...   | ...                     | ...                 | ...                      | ...                   |
| 75 | Sri Lanka                         | SOA    | 92            | 0.715 | 75.1                    | 5,170               | 373                      | 98                    |
| 76 | Sudan                             | SSA    | 171           | 0.414 | 61.8                    | 1,848               | 1,447                    | 21                    |
| 77 | Swaziland                         | SSA    | 141           | 0.536 | 48.9                    | 5,104               | 35                       | 80                    |
| 78 | Syrian Arab Republic              | MEN    | 116           | 0.648 | 76                      | 4,674               | 466                      | 78                    |
| 79 | Tajikistan                        | ECA    | 125           | 0.622 | 67.8                    | 2,119               | 194                      | 88                    |
| 80 | Tanzania, United Republic of      | SSA    | 152           | 0.476 | 58.9                    | 1,383               | 1,913                    | 50                    |
| 81 | Timor-Leste                       | EAP    | 134           | 0.576 | 62.9                    | 5,446               | 44                       | 22                    |
| 82 | Togo                              | SSA    | 158           | 0.459 | 57.5                    | 928                 | 195                      | 67                    |
| 83 | Tonga                             | EAP    | 95            | 0.71  | 72.5                    | 4,153               | 3                        | 98                    |
| 84 | Tuvalu                            | EAP    | ...           | ...   | 67.5                    | 5,650               | ...                      | 93                    |
| 85 | Uganda                            | SSA    | 161           | 0.456 | 54.5                    | 1,168               | 1,545                    | 57                    |
| 86 | Uzbekistan                        | ECA    | 114           | 0.654 | 68.6                    | 3,201               | 589                      | 97                    |
| 87 | Vanuatu                           | EAP    | 124           | 0.626 | 71.3                    | 3,960               | 7                        | 80                    |
| 88 | Vietnam                           | EAP    | 127           | 0.617 | 75.4                    | 2,970               | 1,458                    | 92                    |
| 89 | Yemen                             | MEN    | 160           | 0.458 | 65.9                    | 1,820               | 940                      | 24                    |
| 90 | Zambia                            | SSA    | 163           | 0.448 | 49.4                    | 1,358               | 622                      | 48                    |
| 91 | Zimbabwe                          | SSA    | 172           | 0.397 | 52.7                    | 424                 | 377                      | 65                    |

HDI: Human Development Index; GNI: Gross National Income; World Regions: East Asia & Pacific (EAP), Europe & Central Asia (ECA), Latin America & Caribbean (LAC), Middle East & North Africa (MEN), South of Asia (SOA) and Sub-Saharan Africa (SSA).

Notes: The human development index (HDI), is published by the United Nations Development Program (UNDP). It is a robust composite measure of the average achievement in three basic dimensions of human development namely: a long and healthy life (health), knowledge (education) and a decent standard of living (income). By world regions, 42 (46%) countries are from Sub-Saharan Africa, 18 (20%) from East Asia & Pacific, 10 (11%) from Latin America & Caribbean, 8 (9%) from Middle East & North Africa, 7 (8%) from South Asia and 6 (6%) from Europe & Central Asia. About a third (33 countries) have at least half a million live-births annually, account for over half (58%) of global births and have a median institutional delivery rate of 47% (IQR:35 -65%).
