# Supplementary material for: Management of late-preterm and term infants with hyperbilirubinaemia in resource-constrained settings
Source: Springer Nature journal article supplement (doi:10.1186/s12887-015-0358-z), 2015-04-11
Supplement: MOESM4 [file 9746906]

| <b>Table S3. Bilirubin-Induced Neurological Dysfunction (BIND) II SCORING</b>                                                                              |              |                 |
|------------------------------------------------------------------------------------------------------------------------------------------------------------|--------------|-----------------|
| <b>CLINICAL SIGN (score most severe sign)</b>                                                                                                              | <b>SCORE</b> | <b>SEVERITY</b> |
| <b>MENTAL STATUS</b>                                                                                                                                       |              |                 |
| 0 Normal                                                                                                                                                   | 0            | None            |
| 0 Sleepy but arousable<br>0 Decreased feeding                                                                                                              | 1            | Mild            |
| 0 Lethargy<br>0 Poor suck and/or<br>0 Irritable/jittery with short-term strong suck                                                                        | 2            | Moderate        |
| 0 Semi-coma<br>0 Apnea<br>0 Seizures<br>0 Coma                                                                                                             | 3            | Severe          |
| <b>MUSCLE TONE</b>                                                                                                                                         |              |                 |
| 0 Normal                                                                                                                                                   | 0            | None            |
| 0 Persistent mild hypotonia                                                                                                                                | 1            | Mild            |
| 0 Moderate hypotonia<br>0 Moderate hypertonia<br>0 Increasing arching of neck and trunk on stimulation without spasms of arms and legs and without trismus | 2            | Moderate        |
| 0 Persistent retrocolis<br>0 Opisthotonos<br>0 Crossing or scissoring of arms or legs but without spasms of arms and legs and without trismus              | 3            | Severe          |
| <b>CRY PATTERN</b>                                                                                                                                         |              |                 |
| 0 Normal                                                                                                                                                   | 0            | None            |
| 0 High-pitched                                                                                                                                             | 1            | Mild            |
| 0 Shrill                                                                                                                                                   | 2            | Moderate        |
| 0 Inconsolable crying or<br>0 Cry weak or absent in child with previous history of high pitched or shrill cry                                              | 3            | Severe          |
| <b>OCCULOMOTOR / EYE MOVEMENTS / FACIES</b>                                                                                                                |              |                 |
| 0 Normal                                                                                                                                                   | 0            | None, Mild      |
| 0 Sun-setting<br>0 Paralysis of upward gaze<br>0 Disconjugate eye movements<br>0 Blank stare<br>0 Aimless eye movements                                    | 3            | Severe          |
| <b>TOTAL BIND II (ABE SCORE)</b>                                                                                                                           |              |                 |

**Notes: Scores of 1-4** are consistent with **mild ABE** but cannot be differentiated from sepsis or other neonatal illnesses without ancillary testing, such as ABR and/or MRI.

**Scores 5 to 8** are consistent with **moderate ABE**

**Scores ≥ 9** are consistent with **severe ABE**

The BIND score may include different stages for different categories, for example scores of 4 or 5 might represent the sum of one for cry and two for muscle tone and/or arousal state.

**Adapted from:**

1. Johnson L, Bhutaini VK, Karp K, Sivieri EM, Shapiro SM. \*422; #Clinical report from the pilot USA Kernicterus Registry (1992 to 2004). *J Perinatol* 29; Suppl 1:S25-45.
2. Slusher T, Olusanya B. (2012) Neonatal Jaundice in Low-Middle Income Countries: In: Stevenson D, Maisels M, Watchko J, editors. Neonatal Jaundice Transient Unconjugated Hyperbilirubinemia of the Newborn. New York. McGraw Hill.
